# Supplementary material for: Facile synthesis of folic acid-functionalized iron oxide nanoparticles with ultrahigh relaxivity for targeted tumor MR imaging
Source: Royal Society of Chemistry journal article supplement (doi:10.1039/c5tb00849b), 2015-01-01
Supplement: c5tb00849b1.pdf [file c5tb00849b1.pdf]

## Electronic Supplementary Information

### **Facile synthesis of folic acid-functionalized iron oxide nanoparticles with ultrahigh relaxivity for targeted tumor MR imaging**

Jingchao Li,<sup>a1</sup> Yong Hu,<sup>a1</sup> Jia Yang,<sup>b1</sup> Wenjie Sun,<sup>a</sup> Hongdong Cai,<sup>c</sup> Ping Wei,<sup>a</sup> Yaping Sun,<sup>d\*</sup>

Guixiang Zhang,<sup>b</sup> Xiangyang Shi,<sup>a, c\*</sup> Mingwu Shen<sup>a\*</sup>

<sup>a</sup> College of Chemistry, Chemical Engineering and Biotechnology, Donghua University, Shanghai 201620, People's Republic of China

<sup>b</sup> Department of Radiology, Shanghai General Hospital, School of Medicine, Shanghai Jiaotong University, Shanghai 200080, People's Republic of China

<sup>c</sup> State Key Laboratory for Modification of Chemical Fibers and Polymer Materials, College of Materials Science and Engineering, Donghua University, Shanghai 201620, People's Republic of China

<sup>d</sup> Department of Cardiographic Ultrason, Shanghai General Hospital, School of Medicine, Shanghai Jiaotong University, Shanghai 200080, People's Republic of China

---

\*To whom correspondence should be addressed. E-mail addresses: xshi@dhu.edu.cn (X. Shi), mwshen@dhu.edu.cn (M. Shen), or syp2101@hotmail.com (Y. Sun).

<sup>1</sup> Authors contributed equally to this work.

## Part of experimental details:

**Preparation of PEI-coated Fe<sub>3</sub>O<sub>4</sub> NPs.** PEI-coated Fe<sub>3</sub>O<sub>4</sub> NPs (Fe<sub>3</sub>O<sub>4</sub>@PEI NPs) were synthesized *via* a mild reduction route according to the literature<sup>1, 2</sup> with some modifications. Briefly, FeCl<sub>3</sub>·6H<sub>2</sub>O (1.3 g) was dissolved in 20 mL water and placed into a 250-mL three-necked flask. Under vigorous magnetic stirring, the solution was bubbled with N<sub>2</sub> atmosphere for 15 min, and then freshly prepared sodium sulfite solution (0.2 g, 10 mL) was added slowly into the flask. After 30 min, PEI (0.5 g, 5 mL) and ammonia (2 mL) were successively added into the flask. The reaction mixture was vigorously stirred for 30 min at 60~70 °C, and then for another 1.5 h at room temperature. The product of Fe<sub>3</sub>O<sub>4</sub>@PEI NPs was magnetically collected and washed 3 times with water. Finally, the product was centrifuged (8000 rpm, 10 min) to remove the aggregated larger particles.

### **Acetylation of the remaining PEI surface amines on the surfaces of PEI-coated Fe<sub>3</sub>O<sub>4</sub> NPs.**

The remaining PEI surface amines on the particle surfaces were acetylated according to the literature.<sup>3, 4</sup> Briefly, triethylamine (493 μL) was added into an aqueous solution of the Fe<sub>3</sub>O<sub>4</sub>@PEI-FI-PEG-FA NPs under vigorous vibrating using a shaker at room temperature. After 30 min, acetic anhydride (402 μL) was dropwise added into the above mixture solution and the reaction was continued for 1 day. The mixture was subjected to 3 cycles of magnetic separation/washing/redispersion steps to remove excess reactants and by-products. The formed final product (FA-functionalized Fe<sub>3</sub>O<sub>4</sub> NPs) was dispersed in water and stored under 4 °C before further use.

**Hemolysis assay.** Fresh human blood stabilized with EDTA was kindly provided by Shanghai First People's Hospital (Shanghai, China) and used with the permission by the ethical committee of Shanghai First People's Hospital. Human red blood cells (HRBCs) were obtained according to our previous work.<sup>5-7</sup> For hemolysis assay, the purified HRBCs were 10 times diluted with PBS. Then, 0.1 mL diluted HRBC suspension was mixed with 0.9 mL water as a positive control, 0.9 mL PBS as a negative control, and 0.9 mL FA-functionalized Fe<sub>3</sub>O<sub>4</sub> NPs dispersed in PBS at different Fe

concentrations (0.5-8.0 mM), respectively. Each mixture solution was gently vortexed and then kept still for 2 h at room temperature. After centrifugation (10 000 rpm, 1 min), the photo of each sample was taken and the absorbance of the supernatants (hemoglobin) for each sample was recorded by Lambda 25 UV-vis spectrophotometer. The hemolysis percentage of each sample was calculated by dividing the difference in absorbances at 541 nm between the samples and the negative control by the difference in absorbances at 541 nm between the positive and negative controls.

**Confocal microscopic observation.** The cellular uptake of the FA-functionalized Fe<sub>3</sub>O<sub>4</sub> NPs was also evaluated by confocal microscopy (Carl Zeiss LSM 700, Jena, Germany) according to our previous report.<sup>8</sup> Coverslips with a diameter of 14 mm were pretreated and fixed in a 12-well tissue culture plate according to our previous report.<sup>8</sup> HeLa-HFAR cells were seeded at a density of  $5 \times 10^4$  cells per well with 1 mL DMEM medium and cultured at 37 °C and 5% CO<sub>2</sub> overnight to allow the cells to be well attached. After that, the medium of cells was removed carefully and 1 mL fresh medium containing PBS (control) or the FA-functionalized Fe<sub>3</sub>O<sub>4</sub> NPs at an Fe concentration of 0.4 mM was added into each well. After incubation at 37 °C and 5% CO<sub>2</sub> for 4 h, the cells were washed 3 times with PBS, fixed with glutaraldehyde (2.5%), and counterstained with Hoechst 33342 (1 µg/mL) using a standard procedure. Finally, the cells on the coverslips were imaged using a 63 × oil-immersion objective lens. HeLa-LFAR cells were also treated and observed in a similar manner for comparison.

## References:

1. J. Hong, D. Xu, J. Yu, P. Gong, H. Ma and S. Yao, *Nanotechnology*, 2007, **18**, 135608.
2. Y. Hu, J. Li, J. Yang, P. Wei, Y. Luo, L. Ding, W. Sun, G. Zhang, X. Shi and M. Shen, *Biomater. Sci.*, 2015, **3**, 721-732.
3. H. Liu, Y. Xu, S. Wen, Q. Chen, L. Zheng, M. Shen, J. Zhao, G. Zhang and X. Shi, *Chem. Eur. J.*, 2013, **19**, 6409-6416.

4. C. Peng, H. Wang, R. Guo, M. Shen, X. Cao, M. Zhu, G. Zhang and X. Shi, *J. Appl. Polym. Sci.*, 2011, **119**, 1673-1682.
5. Y. Zhao, S. Wang, Q. Guo, M. Shen and X. Shi, *J. Appl. Polym. Sci.*, 2013, **127**, 4825-4832.
6. H. Cai, K. Li, M. Shen, S. Wen, Y. Luo, C. Peng, G. Zhang and X. Shi, *J. Mater. Chem.*, 2012, **22**, 15110-15120.
7. J. Li, L. Zheng, H. Cai, W. Sun, M. Shen, G. Zhang and X. Shi, *ACS Appl. Mater. Interfaces*, 2013, **5**, 10357-10366.
8. S. Wang, Y. Wu, R. Guo, Y. Huang, S. Wen, M. Shen, J. Wang and X. Shi, *Langmuir*, 2013, **29**, 5030-5036.

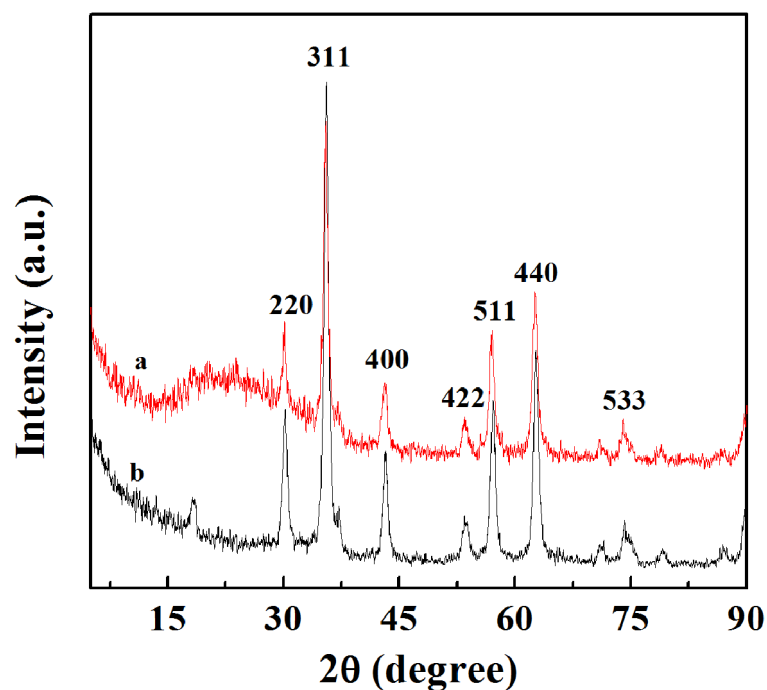

**Fig. S1** XRD pattern of the formed Fe<sub>3</sub>O<sub>4</sub>@PEI NPs (a) and naked Fe<sub>3</sub>O<sub>4</sub> NPs (b).

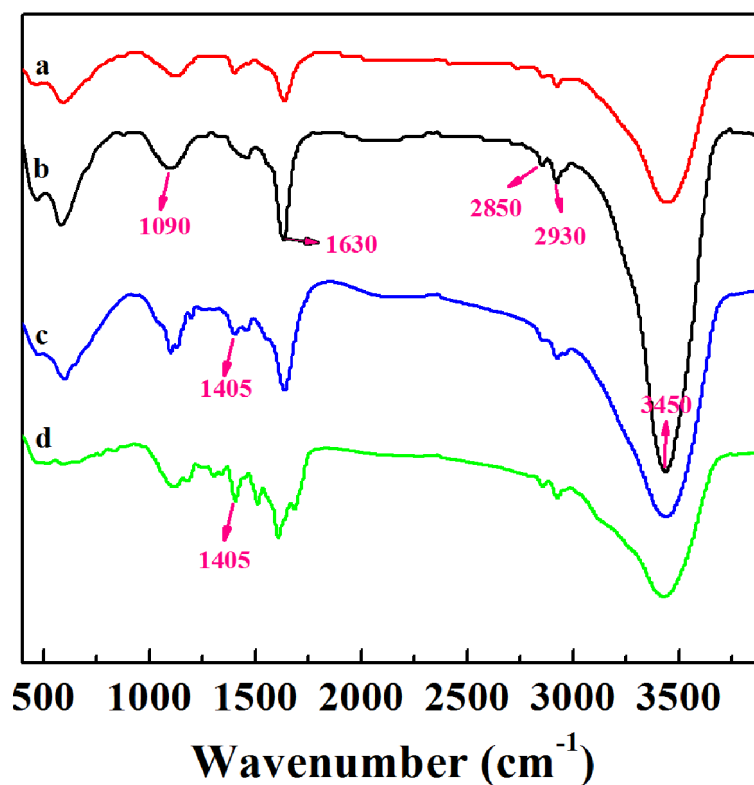

**Fig. S2** FTIR spectra of the naked Fe<sub>3</sub>O<sub>4</sub> NPs (a), Fe<sub>3</sub>O<sub>4</sub>@PEI NPs (b), Fe<sub>3</sub>O<sub>4</sub>@PEI-PEG-FA NPs (c), and FA (d).

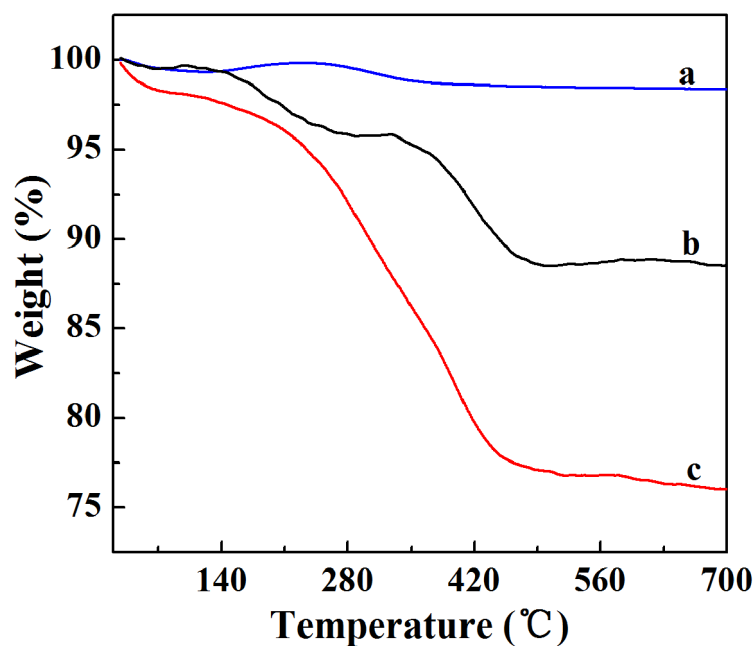

**Fig. S3** TGA curves of naked  $\text{Fe}_3\text{O}_4$  (a),  $\text{Fe}_3\text{O}_4@\text{PEI}$  (b), and  $\text{Fe}_3\text{O}_4@\text{PEI-PEG-FA}$  (c) NPs.

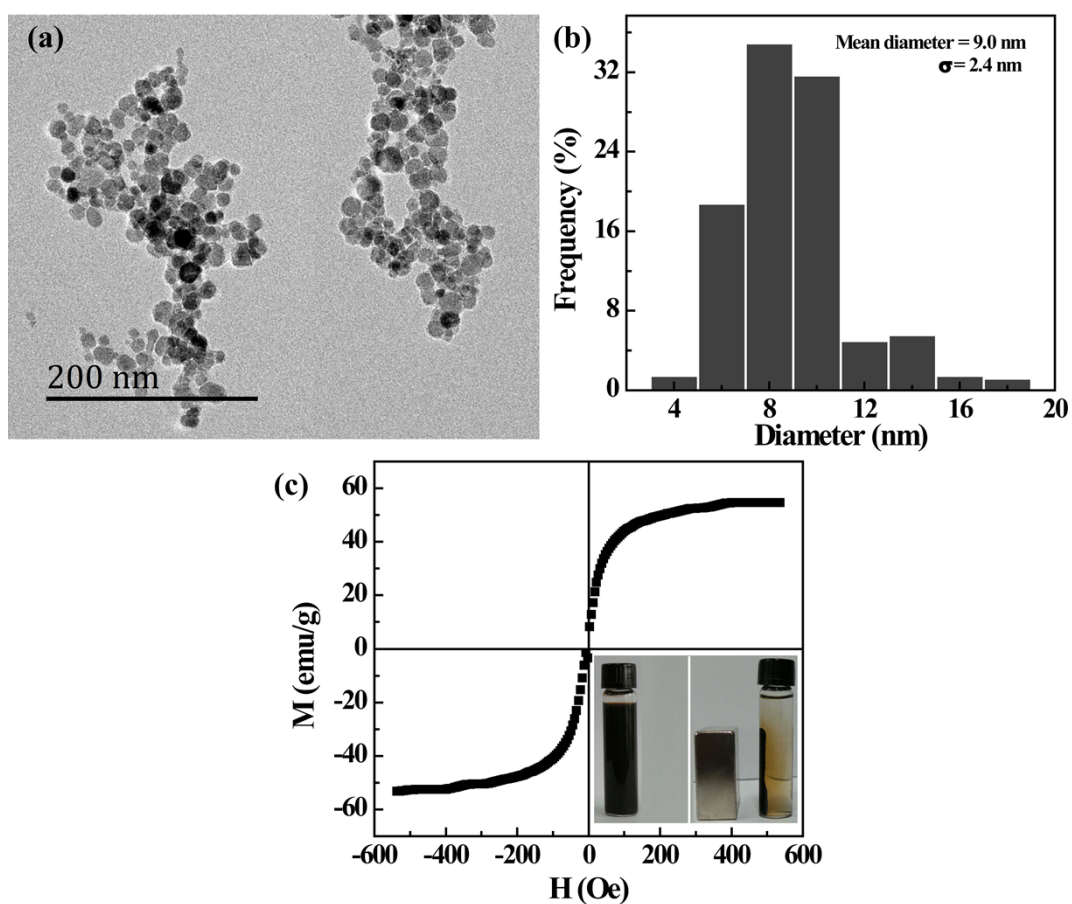

**Fig. S4** TEM image (a) and size distribution histogram (b) of the  $\text{Fe}_3\text{O}_4@\text{PEI}$  NPs and room temperature magnetization curve of  $\text{Fe}_3\text{O}_4@\text{PEI}$  NPs (c). Inset of (c) is the digital picture of the aqueous suspension of  $\text{Fe}_3\text{O}_4@\text{PEI}$  NPs before and after exposed to a magnetic field.

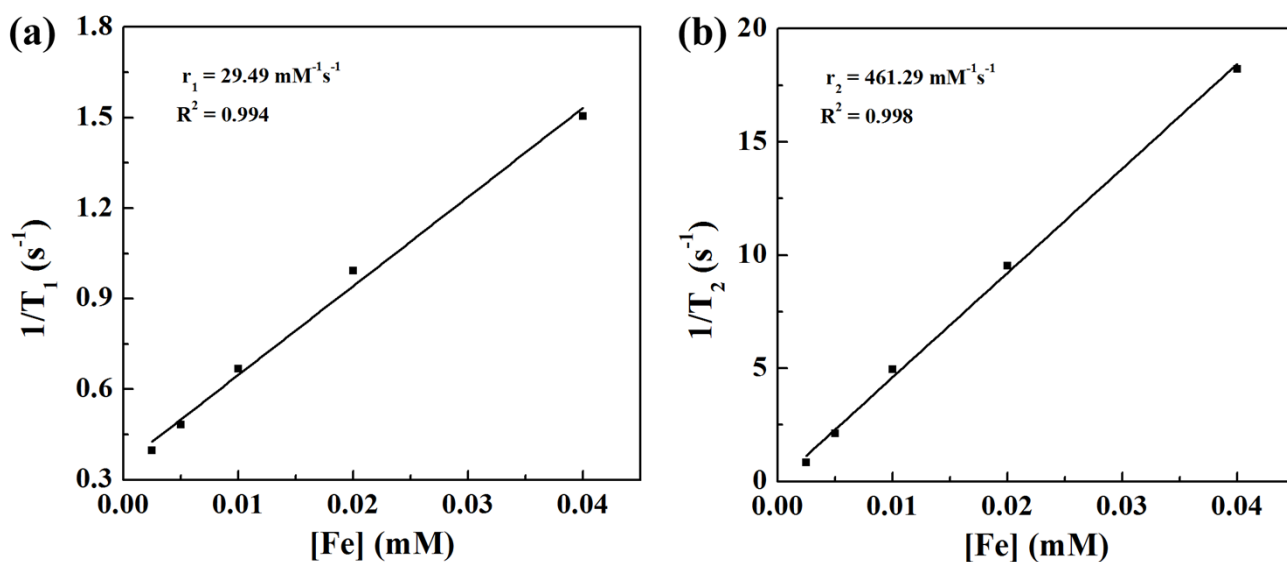

**Fig. S5** Linear fitting of  $1/T_1$  (a) and  $1/T_2$  (b) of the  $\text{Fe}_3\text{O}_4@\text{PEI}$  NPs as a function of Fe concentration.

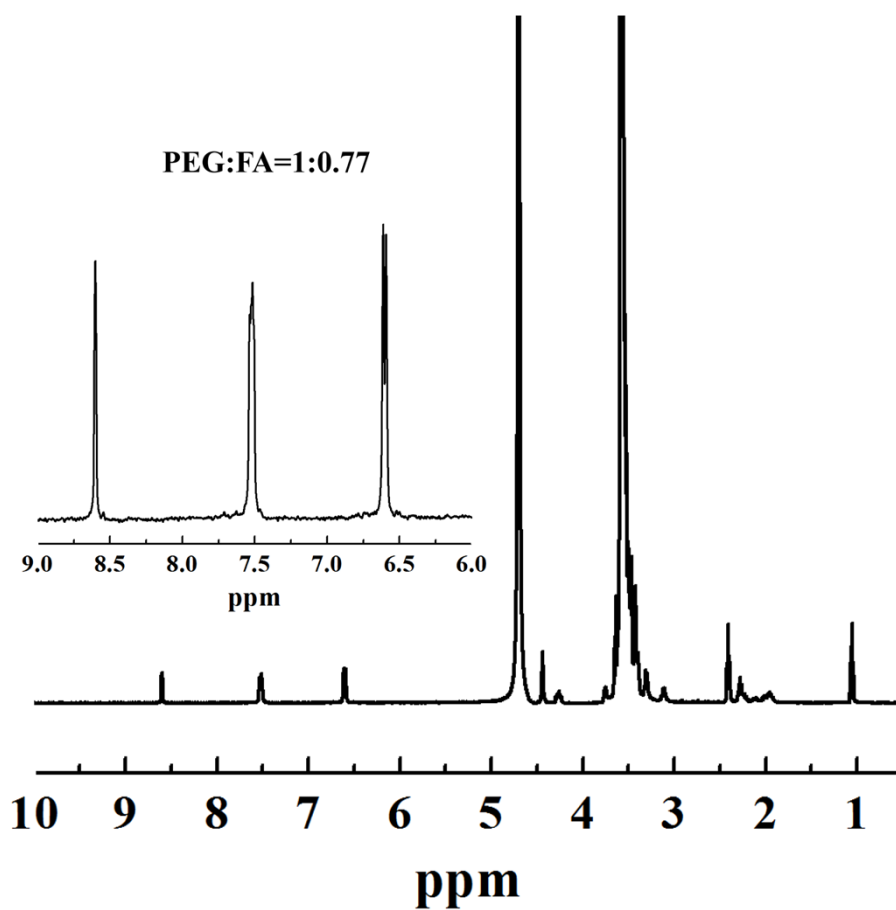

**Fig. S6**  $^1\text{H}$  NMR spectrum of PEGylated FA dissolved in  $\text{D}_2\text{O}$ .

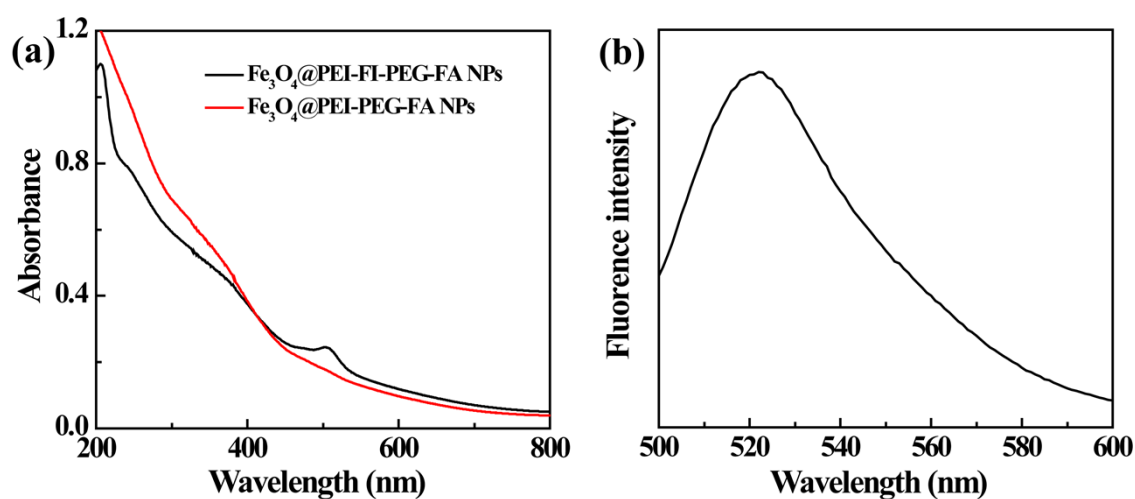

**Fig. S7** (a) UV-vis spectra of the Fe<sub>3</sub>O<sub>4</sub>@PEI-PEG-FA NPs and Fe<sub>3</sub>O<sub>4</sub>@PEI-FI-PEG-FA NPs dispersed in water; (b) fluorescent emission spectrum of the Fe<sub>3</sub>O<sub>4</sub>@PEI-FI-PEG-FA NPs dispersed in water.

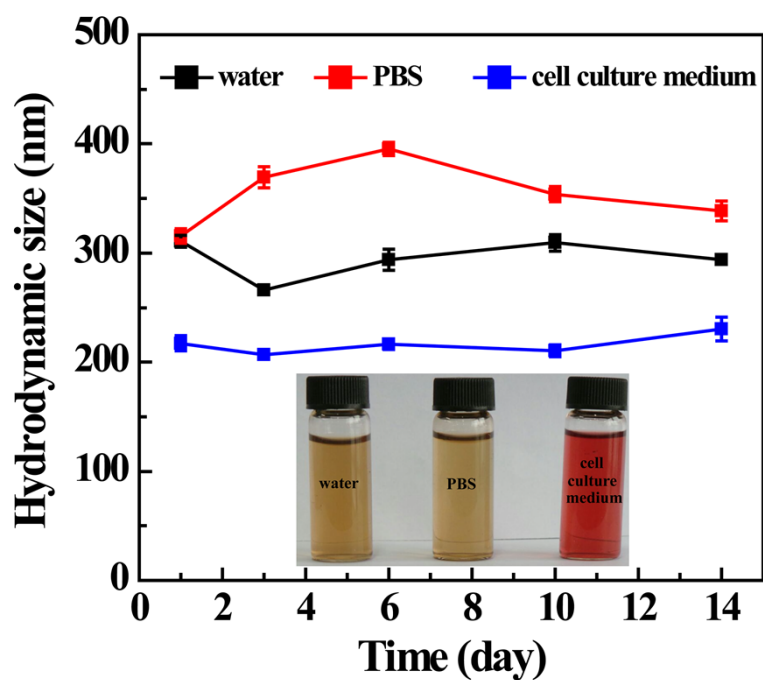

**Fig. S8** Hydrodynamic size of the FA-functionalized Fe<sub>3</sub>O<sub>4</sub> NPs dispersed in water, PBS buffer, or cell culture medium at different storage time periods. Shown in the inset is the photo of the particles dispersed in water, PBS, and cell culture medium for a period of one month.

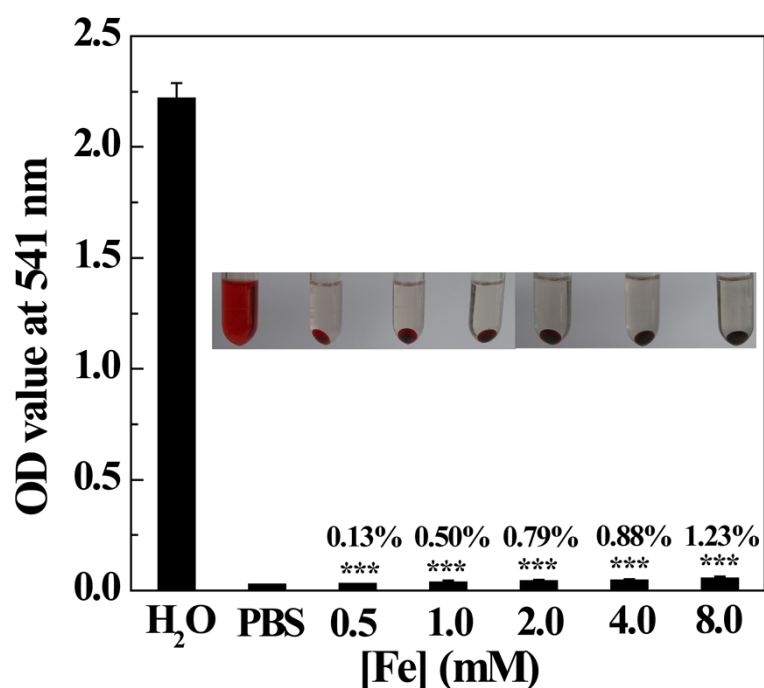

**Fig. S9** Hemolytical activity of the FA-functionalized Fe<sub>3</sub>O<sub>4</sub> NPs at different Fe concentrations. PBS and water were used as negative and positive control, respectively. The insets show the photograph of the HRBCs exposed to water, PBS, and PBS containing the particles at different Fe concentrations for 2 h, followed by centrifugation. The percentage values shown in the figure are the hemolysis percentages.

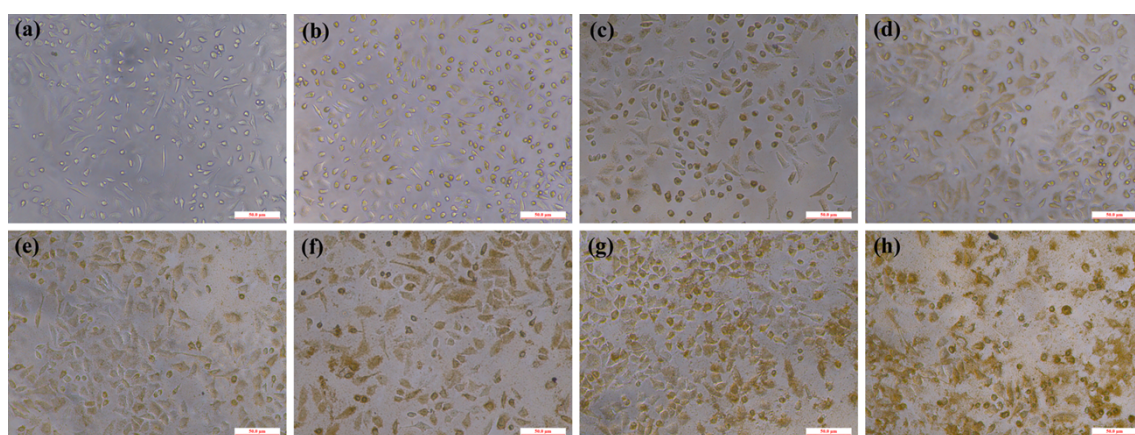

**Fig. S10** Phase contrast microscopic images of HeLa cells treated with PBS (a) and FA-functionalized Fe<sub>3</sub>O<sub>4</sub> NPs at the Fe concentrations of 0.2 mM (b), 0.4 mM (c), 0.6 mM (d), 0.8 mM (e), 1.0 mM (f), 1.5 mM (g), and 2.0 mM (h), respectively for 24 h. The scale bar in each panel represents 50 μm.

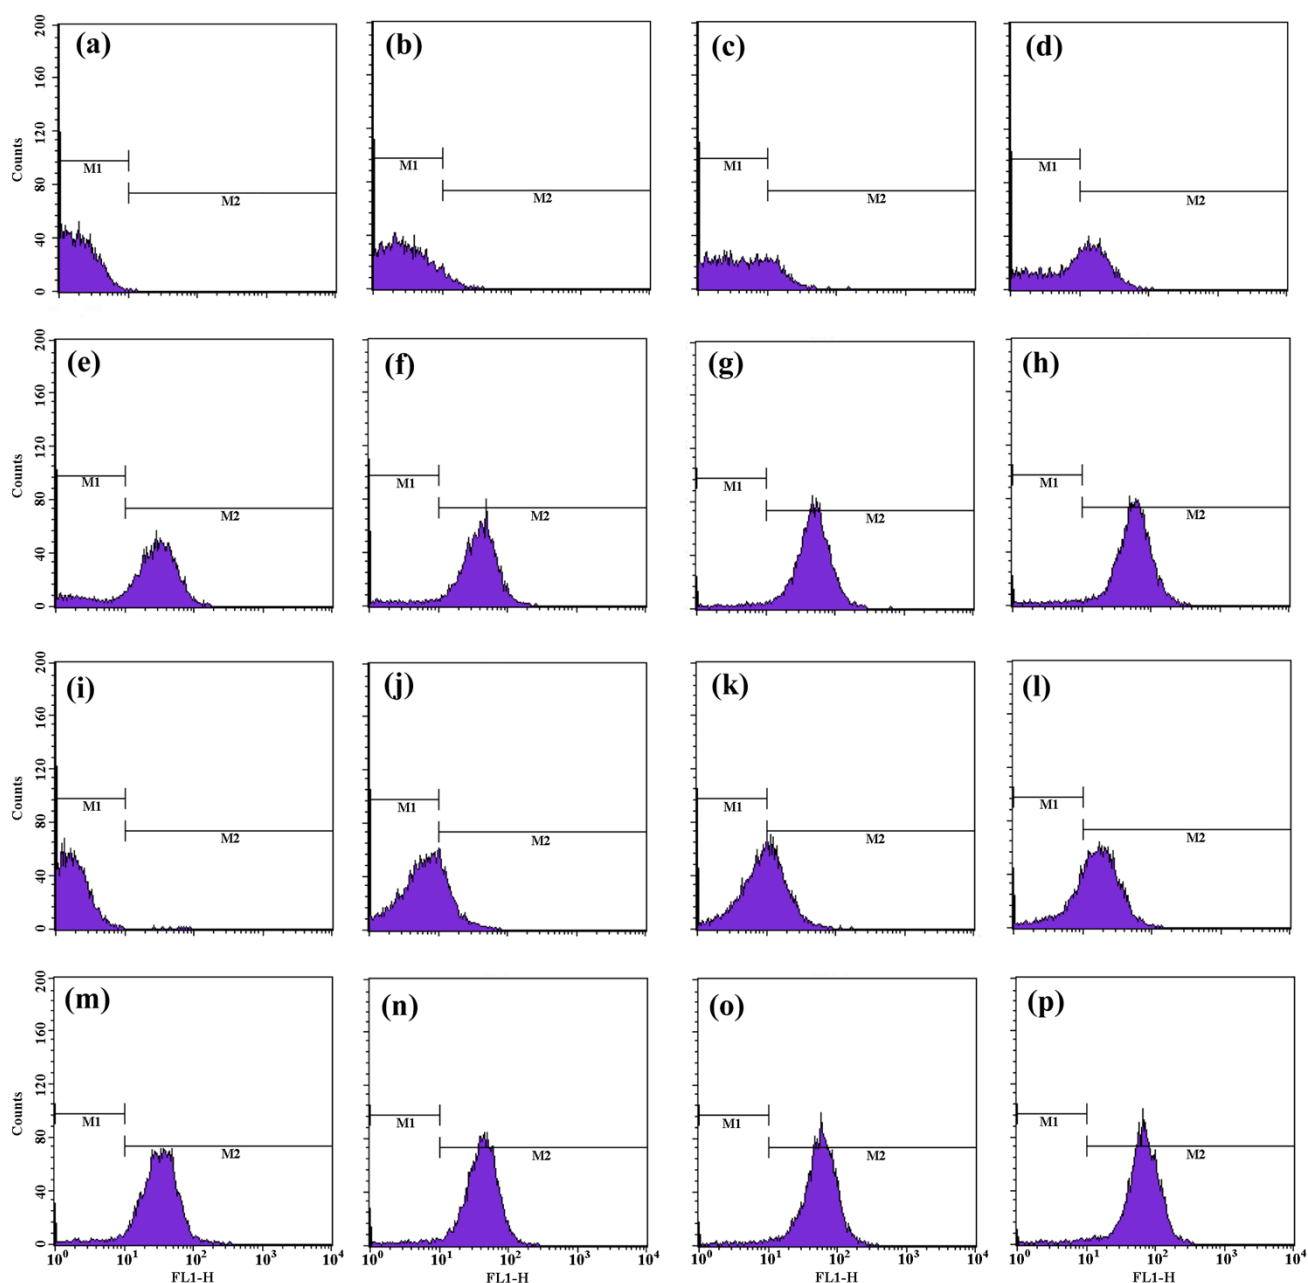

**Fig. S11** Flow cytometric analysis of HeLa-HFAR cells treated with PBS (a), FA-functionalized  $\text{Fe}_3\text{O}_4$  NPs at the Fe concentrations of 0.05 mM (b), 0.1 mM (c), 0.2 mM (d), 0.4 mM (e), 0.6 mM (f), 0.8 mM (g), 1.0 mM (h) and HeLa-LFAR cells treated with PBS (i), FA-functionalized  $\text{Fe}_3\text{O}_4$  NPs at the Fe concentrations of 0.05 mM (j), 0.1 mM (k), 0.2 mM (l), 0.4 mM (m), 0.6 mM (n), 0.8 mM (o), 1.0 mM (p), respectively for 4 h.

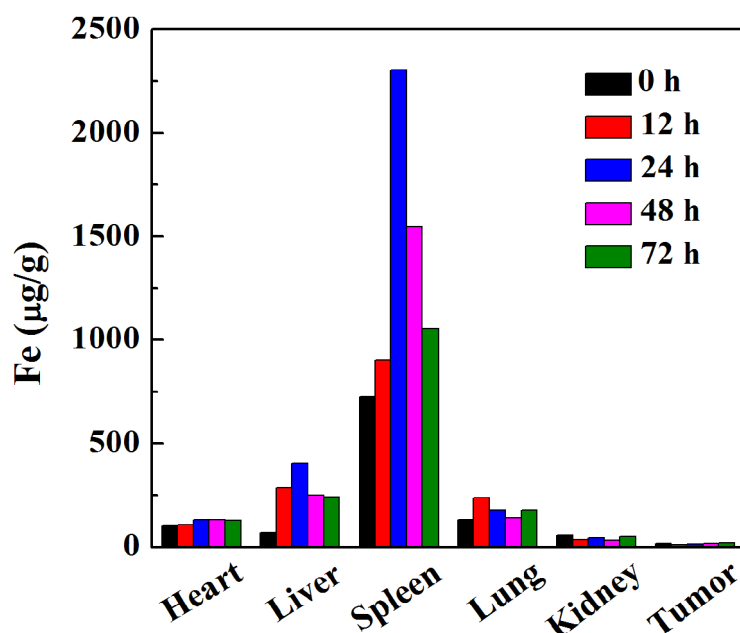

**Fig. S12** *In vivo* biodistribution of Fe element in the major organs of the tumor-bearing mice including heart, liver, spleen, lung, kidney, and tumor at different time points post intravenous injection of the FA-functionalized  $\text{Fe}_3\text{O}_4$  NPs ( $[\text{Fe}] = 80 \text{ mM}$ , in  $0.1 \text{ mL PBS}$ ).

**Table S1** Zeta potentials and hydrodynamic sizes of the naked  $\text{Fe}_3\text{O}_4$ ,  $\text{Fe}_3\text{O}_4@\text{PEI}$ ,  $\text{Fe}_3\text{O}_4@\text{PEI-FI-PEG-FA}$ , and  $\text{Fe}_3\text{O}_4@\text{PEI.Ac-FI-PEG-FA}$  NPs. Data are provided as mean  $\pm$  SD ( $n = 3$ ).

| Materials                                           | Zeta potential<br>(mV) | Hydrodynamic size<br>(d. nm) | Polydispersity index<br>(PDI) |
|-----------------------------------------------------|------------------------|------------------------------|-------------------------------|
| Naked $\text{Fe}_3\text{O}_4$ NPs                   | $-9.0 \pm 0.4$         | $1177.6 \pm 60.9$            | $0.42 \pm 0.15$               |
| $\text{Fe}_3\text{O}_4@\text{PEI}$ NPs              | $52.8 \pm 1.9$         | $164.2 \pm 4.3$              | $0.11 \pm 0.04$               |
| $\text{Fe}_3\text{O}_4@\text{PEI-FI-PEG-FA}$ NPs    | $39.4 \pm 1.6$         | $284.7 \pm 5.9$              | $0.19 \pm 0.01$               |
| $\text{Fe}_3\text{O}_4@\text{PEI.Ac-FI-PEG-FA}$ NPs | $24.2 \pm 2.3$         | $310.5 \pm 8.7$              | $0.14 \pm 0.03$               |
